# Supplementary material
Source: PubMed Central journal article supplement (PMC2930574)
Supplement: 1009941107_pnas.201009941SI.pdf [file 1009941107_pnas.201009941SI.pdf]

# Supporting Information

Poulogiannis et al. 10.1073/pnas.1009941107

## SI Materials and Methods

**Bioinformatic Analysis of Genome and Transcriptome Data.** The aCGH package in R was used to identify significant DNA copy number (DCN) changes in our collection of 100 sporadic CRCs (1) (Gene Expression Omnibus, accession no. GSE12520). The aCGH analysis of cell lines and liver metastases was derived from published data (2, 3). Chromosome 6 tiling-path array-CGH was used to identify the smallest and most frequently altered regions of DNA copy number change on chromosome 6. An integrative approach was used to correlate expression profiles with genomic copy number data from a SNP array from the same tumors ( $n = 48$ ) (4) (GSE16125), using Pearson's correlation coefficient analysis to identify the relationships between DNA copy number changes and gene expression of those genes located within the small frequently altered regions of DCN change identified by tiling-path array-CGH on chromosome 6. Finally, the differentially expressed genes between high- and low-*PARK2* expressing tumors, from a previously published dataset (GSE12945) of microdissected CRCs (5), were computed using a linear model, based on an empirical Bayes (eBayes) method (6) embedded within the Limma package. The  $P$ -values were adjusted for multiple testing (7).

**Loss of Heterozygosity (LOH) Analysis of *PARK2*.** Seven microsatellite markers (D6S1550, D6S253, D6S305, D6S955, D6S980, D6S1599, and D6S396) were amplified for LOH analysis within the *PARK2* locus using primers that were previously described (8).

**MSP of the *PARK2* Promoter.** CpG sites within the *PARK2* promoter region were detected using the Methprimer software (<http://www.urogene.org/methprimer/index.html>). Methylation-specific and control primers were designed using the Primo MSP software (<http://www.changbioscience.com/primo/primom.html>); bisulfite modification of genomic DNA was performed as described previously (9). All tumor DNA samples from primary CRC tumors ( $n = 100$ ) and CRC lines ( $n = 5$ ), as well as those from the leukemia cell lines KG-1a (acute myeloid leukemia, AML), U937 (acute lymphoblastic leukemia, ALL), and Raji (Burkitt lymphoma, BL) were screened as part of this analysis. *SssI* DNA, composed of mixed unmethylated and methylated human sperm DNA treated with *SssI* methyltransferase, was used as a positive control (Qiagen).

**Immunohistochemistry.** Immunostaining was performed on 4- $\mu$ m sections with the rabbit Vectastain Elite ABC horseradish peroxidase kit (Vector Laboratories) using primary antibodies:  $\beta$ -catenin (1:50; Cell Signaling Technology, no. 9587) and Parkin (1:75; Epitomics, no. 1679-1).

1. Poulogiannis G, et al. (2010) Prognostic relevance of DNA copy number changes in colorectal cancer. *J Pathol* 220:338–347.
2. Douglas EJ, et al. (2004) Array comparative genomic hybridization analysis of colorectal cancer cell lines and primary carcinomas. *Cancer Res* 64:4817–4825.
3. Mehta KR, et al. (2005) Fractional genomic alteration detected by array-based comparative genomic hybridization independently predicts survival after hepatic resection for metastatic colorectal cancer. *Clin Cancer Res* 11:1791–1797.
4. Reid JF, et al. (2009) Integrative approach for prioritizing cancer genes in sporadic colon cancer. *Genes Chromosomes Cancer* 48:953–962.
5. Staub E, et al. (2009) An expression module of WIPF1-coexpressed genes identifies patients with favorable prognosis in three tumor types. *J Mol Med* 87:633–644.
6. Smyth GK (2004) Linear models and empirical bayes methods for assessing differential expression in microarray experiments. *Stat Appl Genet Mol Biol*, 10.2202/1544-6115.1027.
7. Benjamini Y, Hochberg Y (1995) Controlling the false discovery rate: A practical and powerful approach to multiple testing. *J R Stat Soc Ser B* 57:289–300.
8. Denison SR, Callahan G, Becker NA, Phillips LA, Smith DI (2003) Characterization of FRA6E and its potential role in autosomal recessive juvenile parkinsonism and ovarian cancer. *Genes Chromosomes Cancer* 38:40–52.
9. Herman JG, Graff JR, Myöhänen S, Nelkin BD, Baylin SB (1996) Methylation-specific PCR: a novel PCR assay for methylation status of CpG islands. *Proc Natl Acad Sci USA* 93:9821–9826.
10. Mata IF, Lockhart PJ, Farrer MJ (2004) Parkin genetics: One model for Parkinson's disease. *Hum Mol Genet* 13 (Spec No 1):R127–R133.

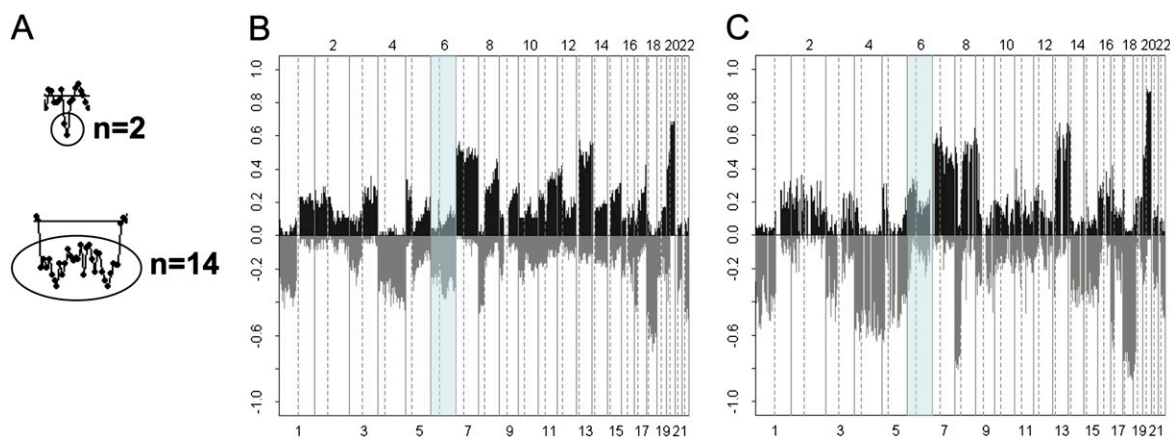

**Fig. S1.** (A) Examples of 2 (Upper) versus 14 (Lower) consecutive clones that are deleted in CRC samples as detected by chromosome 6 tiling-path array-CGH. (B and C) Overall frequencies of DNA copy number alterations (y axis) plotted by chromosome number (x axis) as assessed by 1-Mb array-CGH in 49 CRC lines (2) (B) and 51 hepatic resections of metastatic CRC (3) (C), respectively.





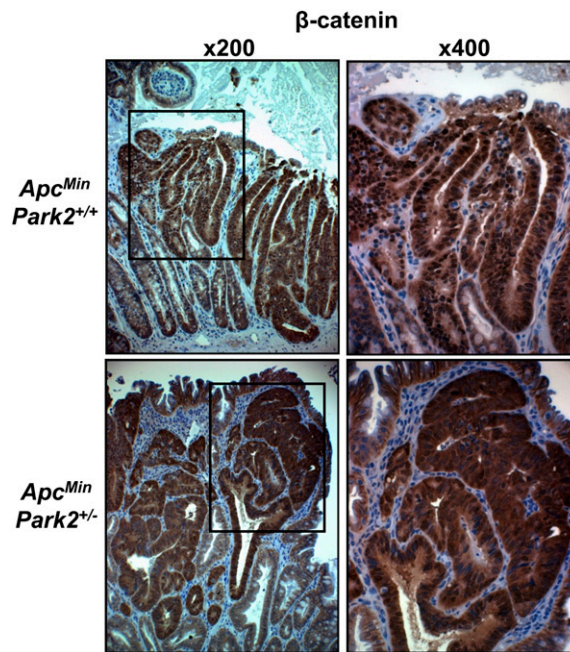

**Fig. S6.** Representative photomicrographs of  $\beta$ -catenin immunohistochemistry in 4  $\mu$ m-thick sections containing intestinal adenomas from  $Apc^{+Min}/Park2^{+/+}$  and  $Apc^{+Min}/Park2^{+/-}$  mice, showing greater  $\beta$ -catenin accumulation in adenomas relative to adjacent normal epithelium with nuclear localization. Original magnification 200 $\times$  (Upper Left and Lower Left) and 400 $\times$  (Upper Right and Lower Right).

**Table S1. Correlation statistics between copy number and expression level of the genes located within the small regions of copy number change identified in chromosome 6**

| Region          | Clone name      | Band        | Change       | Candidate genes     | Correlation coefficient | P value |
|-----------------|-----------------|-------------|--------------|---------------------|-------------------------|---------|
| 1               | RP3-416J7       | 6p25.3      | G/L          | <i>No genes</i>     | —                       | —       |
|                 | RP11-328C17     |             |              | <i>DUSP22</i>       | 0.5143                  | 0.0013  |
|                 | RP11-233K4      |             |              | <i>IRF4</i>         | 0.3765                  | 0.0236  |
|                 | RP11-164H16     |             |              | <i>EXOC2</i>        | 0.3371                  | 0.044   |
| 2               | RP1-20B11       | 6p25.3      | L            | <i>HUS1B</i>        | NA                      | NA      |
|                 | RP11-532F6      |             |              | <i>FOXC1</i>        | 0.1537                  | 0.3709  |
|                 | RP1-118B18      |             |              | <i>GMDS</i>         | 0.0994                  | 0.564   |
|                 | RP11-265E5      | 6p25.2      | G            | <i>MYLK4</i>        | 0.5148                  | 0.0013  |
|                 | RP1-279I9       |             |              | <i>RP11-420G6.1</i> | NA                      | NA      |
|                 | RP11-82M9       |             |              | <i>WRNIP1</i>       | 0.1425                  | 0.4071  |
|                 | RP11-612M16     |             |              | <i>WRNIP1</i>       | 0.1328                  | 0.4401  |
|                 | RP1-206F19      |             |              | <i>SERPINB1</i>     | 0.4133                  | 0.0122  |
|                 | RP1-33B19       |             |              | <i>SERPINB9</i>     | 0.4083                  | 0.0134  |
|                 | RP11-420G6      |             |              | <i>SERPINB6</i>     | 0.0748                  | 0.6646  |
|                 |                 |             |              | <i>NQO2</i>         | 0.3433                  | 0.0403  |
|                 | RP1-90J20       |             |              | <i>RIPK1</i>        | 0.1561                  | 0.3633  |
|                 | RP1-40E16       |             |              | <i>BPHL</i>         | NA                      | NA      |
| 3               | RP11-506K6      | 6p24.2–24.1 | L            | <i>TUBB2A</i>       | 0.0552                  | 0.749   |
|                 | RP11-15N12      |             |              | <i>TUBB2B</i>       | 0.0484                  | 0.9062  |
|                 | RP11-716O23     |             |              | <i>PSMG4</i>        | NA                      | NA      |
|                 | RP11-679B17     |             |              | <i>SLC22A23</i>     | 0.0484                  | 0.779   |
|                 | XXbac-BPG8G10   |             |              | <i>TMEM170B</i>     | NA                      | NA      |
|                 | XXbac-BPG249D20 |             |              |                     |                         |         |
|                 |                 |             |              |                     |                         |         |
| 4               | XXbac-BPG27H4   | 6p22.1      | L            | <i>BAT1P1</i>       | NA                      | NA      |
|                 | XXbac-BPG118E17 |             |              | <i>MCCD1P1</i>      | NA                      | NA      |
|                 |                 |             |              | <i>GNL1</i>         | NA                      | NA      |
|                 |                 | 6p21.33     | L            | <i>PRR3</i>         | NA                      | NA      |
|                 |                 |             |              | <i>ABCF1</i>        | NA                      | NA      |
|                 |                 |             |              | <i>PPP1R10</i>      | NA                      | NA      |
|                 |                 |             |              | <i>MRPS1B</i>       | NA                      | NA      |
|                 |                 |             |              | <i>C6orf134</i>     | NA                      | NA      |
|                 |                 |             |              | <i>DHX16</i>        | NA                      | NA      |
|                 |                 |             |              | <i>VAR52</i>        | NA                      | NA      |
|                 | XXbac-BPG248L24 | G           | G/L          | <i>GTF2H4</i>       | −0.2117                 | 0.2151  |
|                 |                 |             |              | <i>SFTA2</i>        | NA                      | NA      |
|                 |                 |             |              | <i>DPCR1</i>        | NA                      | NA      |
|                 | <i>C6orf205</i> |             |              | NA                  | NA                      |         |
| XXbac-BPG181B23 |                 |             | <i>HLA-C</i> | 0.3913              | 0.0183                  |         |
|                 |                 |             | <i>HLA-B</i> | NA                  | NA                      |         |
|                 |                 |             | <i>MICA</i>  | NA                  | NA                      |         |

Table S1. Cont.

| Region            | Clone name      | Band    | Change         | Candidate genes | Correlation coefficient | P value |  |                         |    |    |
|-------------------|-----------------|---------|----------------|-----------------|-------------------------|---------|--|-------------------------|----|----|
| 5                 | XXbac-BPG296P20 | 6p21.33 | L              | <i>ATP6V1G2</i> | NA                      | NA      |  |                         |    |    |
|                   |                 |         |                | <i>MCCD1</i>    | NA                      | NA      |  |                         |    |    |
|                   |                 |         |                | <i>BAT1</i>     | NA                      | NA      |  |                         |    |    |
|                   |                 |         |                | <i>NFKBIL1</i>  | NA                      | NA      |  |                         |    |    |
|                   |                 |         |                | <i>LTA</i>      | NA                      | NA      |  |                         |    |    |
|                   |                 |         |                | <i>TNF</i>      | NA                      | NA      |  |                         |    |    |
|                   |                 |         |                | <i>LTB</i>      | NA                      | NA      |  |                         |    |    |
|                   |                 |         |                | <i>LST1</i>     | NA                      | NA      |  |                         |    |    |
|                   |                 |         |                | <i>NCR3</i>     | NA                      | NA      |  |                         |    |    |
|                   |                 |         |                | <i>BAT2</i>     | NA                      | NA      |  |                         |    |    |
|                   |                 |         |                | <i>BAT3</i>     | NA                      | NA      |  |                         |    |    |
|                   |                 |         |                | <i>APOM</i>     | NA                      | NA      |  |                         |    |    |
|                   |                 |         |                | XXbac-BPG32J3   |                         |         |  | <i>C6orf47</i>          | NA | NA |
|                   |                 |         |                |                 |                         |         |  | <i>BAT4</i>             | NA | NA |
|                   | <i>CSNK2B</i>   | NA      | NA             |                 |                         |         |  |                         |    |    |
|                   | <i>LY6G5B</i>   | NA      | NA             |                 |                         |         |  |                         |    |    |
|                   | <i>LY6G5C</i>   | NA      | NA             |                 |                         |         |  |                         |    |    |
|                   | <i>LY6G6E</i>   | NA      | NA             |                 |                         |         |  |                         |    |    |
|                   | <i>BAT5</i>     | NA      | NA             |                 |                         |         |  |                         |    |    |
|                   | <i>LY6G6F</i>   | NA      | NA             |                 |                         |         |  |                         |    |    |
|                   | <i>LY6G6D</i>   | NA      | NA             |                 |                         |         |  |                         |    |    |
|                   | <i>LY6G6C</i>   | NA      | NA             |                 |                         |         |  |                         |    |    |
|                   | <i>C6orf25</i>  | NA      | NA             |                 |                         |         |  |                         |    |    |
|                   | <i>DDAH2</i>    | NA      | NA             |                 |                         |         |  |                         |    |    |
|                   | <i>CLIC1</i>    | NA      | NA             |                 |                         |         |  |                         |    |    |
|                   | <i>MSH5</i>     | 0.4849  | 0.0027         |                 |                         |         |  |                         |    |    |
|                   | <i>C6orf26</i>  | NA      | NA             |                 |                         |         |  |                         |    |    |
|                   | <i>C6orf27</i>  | NA      | NA             |                 |                         |         |  |                         |    |    |
|                   | XXbac-BPG254B15 | 6p21.33 | G/L            | <i>VAR5</i>     | NA                      | NA      |  |                         |    |    |
|                   |                 |         |                | <i>LSM2</i>     | NA                      | NA      |  |                         |    |    |
|                   |                 |         |                | <i>HSPA1L</i>   | NA                      | NA      |  |                         |    |    |
|                   |                 |         |                | <i>HSPA1A</i>   | NA                      | NA      |  |                         |    |    |
|                   |                 |         |                | <i>HSPA1B</i>   | NA                      | NA      |  |                         |    |    |
|                   |                 |         |                | <i>C6orf48</i>  | NA                      | NA      |  |                         |    |    |
|                   |                 |         |                | <i>NEU1</i>     | NA                      | NA      |  |                         |    |    |
|                   |                 |         |                | <i>SLC44A4</i>  | NA                      | NA      |  |                         |    |    |
|                   |                 |         |                | <i>EHMT2</i>    | NA                      | NA      |  |                         |    |    |
|                   |                 |         |                | <i>C2</i>       | NA                      | NA      |  |                         |    |    |
|                   |                 |         |                | <i>ZBTB12</i>   | NA                      | NA      |  |                         |    |    |
|                   |                 |         |                | XXbac-BPG116M5  |                         |         |  | <i>XXbac-BPG116M5.1</i> | NA | NA |
|                   |                 |         |                |                 |                         |         |  | <i>CFB</i>              | NA | NA |
|                   |                 |         |                |                 |                         |         |  | <i>RDBP</i>             | NA | NA |
|                   | <i>SKIV2L</i>   | NA      | NA             |                 |                         |         |  |                         |    |    |
|                   | <i>DOM3Z</i>    | NA      | NA             |                 |                         |         |  |                         |    |    |
|                   | <i>STK19</i>    | NA      | NA             |                 |                         |         |  |                         |    |    |
|                   | <i>STK19P</i>   | NA      | NA             |                 |                         |         |  |                         |    |    |
|                   | <i>C4A</i>      | NA      | NA             |                 |                         |         |  |                         |    |    |
| <i>AL645922.3</i> | NA              | NA      |                |                 |                         |         |  |                         |    |    |
| <i>TNXB</i>       | NA              | NA      |                |                 |                         |         |  |                         |    |    |
| XXbac-BPG15K13    | 6p21.33         | G/L     | <i>CYP21A2</i> | NA              | NA                      |         |  |                         |    |    |
|                   |                 |         | <i>TNXB</i>    | NA              | NA                      |         |  |                         |    |    |
|                   |                 |         | <i>TNXA</i>    | NA              | NA                      |         |  |                         |    |    |



Table S1. Cont.

| Region                 | Clone name                                       | Band    | Change | Candidate genes                    | Correlation coefficient | P value           |                 |        |    |
|------------------------|--------------------------------------------------|---------|--------|------------------------------------|-------------------------|-------------------|-----------------|--------|----|
| 6                      | XXbac-BPG300A18                                  | 6p21.32 | L      | <i>CREBL1</i>                      | NA                      | NA                |                 |        |    |
|                        |                                                  |         |        | <i>AL662884.1</i>                  | NA                      | NA                |                 |        |    |
|                        |                                                  |         |        | <i>FKBPL</i>                       | NA                      | NA                |                 |        |    |
|                        |                                                  |         |        | <i>PRRT1</i>                       | 0.0665                  | 0.6998            |                 |        |    |
|                        |                                                  |         |        | <i>PPT2</i>                        | NA                      | NA                |                 |        |    |
|                        |                                                  |         |        | <i>EGFL8</i>                       | NA                      | NA                |                 |        |    |
|                        |                                                  |         |        | <i>AGPAT1</i>                      | NA                      | NA                |                 |        |    |
|                        |                                                  |         |        | <i>RNF5</i>                        | NA                      | NA                |                 |        |    |
|                        |                                                  |         |        | <i>AGER</i>                        | NA                      | NA                |                 |        |    |
|                        |                                                  |         |        | <i>PBX2</i>                        | NA                      | NA                |                 |        |    |
|                        |                                                  |         |        | <i>GPSM3</i>                       | NA                      | NA                |                 |        |    |
|                        | XXbac-BPG7F7<br>XXbac-BPG495H8<br>XXbac-BPG161M6 | 6p21.32 | L      | <i>NOTCH4</i>                      | NA                      | NA                |                 |        |    |
|                        |                                                  |         |        | <i>C6orf10</i>                     | NA                      | NA                |                 |        |    |
|                        |                                                  |         |        | <i>HLA-DRB9</i>                    | NA                      | NA                |                 |        |    |
|                        |                                                  |         |        | <i>HLA-DRB5</i>                    | 0.2444                  | 0.1508            |                 |        |    |
|                        |                                                  |         |        | <i>HLA-DRB6</i>                    | NA                      | NA                |                 |        |    |
|                        |                                                  |         |        | <i>HLA-DRB1</i>                    | NA                      | NA                |                 |        |    |
|                        |                                                  |         |        | <i>HLA-DQA1</i>                    | NA                      | NA                |                 |        |    |
|                        |                                                  |         |        | <i>AL662789.2</i>                  | NA                      | NA                |                 |        |    |
|                        |                                                  |         |        | <i>HLA-DQB1</i>                    | NA                      | NA                |                 |        |    |
|                        |                                                  |         |        | <i>HLA-DQA2</i>                    | NA                      | NA                |                 |        |    |
|                        |                                                  |         |        | <i>HLA-DQB2</i>                    | NA                      | NA                |                 |        |    |
|                        | XXbac-BPG226C15<br>XXbac-BPG186F10               |         | G      | <i>HLA-DQB3</i>                    | NA                      | NA                |                 |        |    |
|                        |                                                  |         |        | <i>HLA-DMB</i>                     | NA                      | NA                |                 |        |    |
|                        |                                                  |         |        | <i>HLA-DMA</i>                     | NA                      | NA                |                 |        |    |
|                        |                                                  |         |        | <i>BRD2</i>                        | NA                      | NA                |                 |        |    |
|                        |                                                  |         |        | XXbac-BPG181M17<br>XXbac-BPG185D15 |                         | L                 | <i>VPS52</i>    | NA     | NA |
|                        |                                                  |         |        |                                    |                         |                   | <i>RPS18</i>    | NA     | NA |
|                        |                                                  |         |        |                                    |                         |                   | <i>B3GALT4</i>  | NA     | NA |
|                        |                                                  |         |        |                                    |                         |                   | <i>WDR46</i>    | NA     | NA |
|                        |                                                  |         |        |                                    |                         |                   | <i>PFDN6</i>    | NA     | NA |
|                        |                                                  |         |        |                                    |                         |                   | <i>RGL2</i>     | NA     | NA |
|                        |                                                  |         |        |                                    |                         |                   | <i>TAPBP</i>    | NA     | NA |
|                        | <i>ZBTB22</i>                                    | NA      | NA     |                                    |                         |                   |                 |        |    |
|                        | <i>DAXX</i>                                      | NA      | NA     |                                    |                         |                   |                 |        |    |
|                        | XXbac-BPG294E21 RP4-570F3                        |         |        |                                    |                         |                   | <i>KIFC1</i>    | NA     | NA |
|                        |                                                  |         |        |                                    |                         |                   | <i>PHF1</i>     | NA     | NA |
|                        |                                                  |         |        | <i>CUTA</i>                        | NA                      | NA                |                 |        |    |
|                        |                                                  |         |        | <i>SYNGAP1</i>                     | 0.3443                  | 0.0397            |                 |        |    |
|                        |                                                  |         |        | <i>ZBTB9</i>                       | NA                      | NA                |                 |        |    |
|                        |                                                  |         |        | RP1-20C7                           | 6p21.1                  | G/L               | <i>PPP2R5D</i>  | NA     | NA |
|                        |                                                  |         |        |                                    |                         |                   | <i>MEA1</i>     | NA     | NA |
|                        |                                                  |         |        |                                    |                         |                   | <i>KLHDC3</i>   | NA     | NA |
|                        |                                                  |         |        |                                    |                         |                   | <i>C6orf153</i> | NA     | NA |
|                        |                                                  |         |        |                                    |                         |                   | <i>CUL7</i>     | NA     | NA |
|                        |                                                  |         |        |                                    |                         |                   | <i>KLC4</i>     | NA     | NA |
|                        | RP11-387M24                                      |         | L      |                                    |                         |                   | <i>CUL7</i>     | NA     | NA |
| <i>KLC4</i>            |                                                  |         |        |                                    |                         |                   | 0.3654          | 0.0284 |    |
| <i>MRPL2</i>           |                                                  |         |        |                                    |                         |                   | NA              | NA     |    |
| <i>PTK7</i>            |                                                  |         |        |                                    |                         |                   | 0.5467          | 0.0005 |    |
| <i>SRF</i>             |                                                  |         |        |                                    |                         |                   | NA              | NA     |    |
| RP1-241K1<br>RP1-302G2 |                                                  |         |        |                                    | G                       | <i>No genes</i>   | —               | —      |    |
|                        |                                                  |         |        |                                    |                         | <i>AL139392.1</i> | NA              | NA     |    |
|                        |                                                  |         |        |                                    |                         | <i>SLC29A1</i>    | 0.3230          | 0.0546 |    |
|                        |                                                  |         |        |                                    |                         | <i>HSP90AB1</i>   | NA              | NA     |    |
|                        |                                                  |         |        |                                    |                         | <i>SLC35B2</i>    | NA              | NA     |    |
|                        |                                                  |         |        |                                    |                         | <i>NFKBIE</i>     | NA              | NA     |    |
|                        | <i>TMEM151B</i>                                  | NA      | NA     |                                    |                         |                   |                 |        |    |
|                        | <i>AL353588.1</i>                                | NA      | NA     |                                    |                         |                   |                 |        |    |





**Table S2. Primers used for *PARK2* MSP PCR**

| Promoter status          |     | Primer                       |    | No. nucleotides | Product size |
|--------------------------|-----|------------------------------|----|-----------------|--------------|
| Methylated<br>specific   | F5' | AGGTAAGTTTTTCGGTTGTTAAGCG    | 3' | 25              | 178 bp       |
|                          | R5' | GCGACCCAAAACCTACTAAAAATCG    | 3' | 25              |              |
| Unmethylated<br>specific | F5' | AAGTGATTGGTTAATATGGTGGGTG    | 3' | 25              | 160 bp       |
|                          | R5' | ACACAACCCAAAACCTACTAAAAATCAT | 3' | 28              |              |
